# Supplementary material for: Gradients in the biophysical properties of neonatal auditory neurons align with synaptic contact position and the intensity coding map of inner hair cells
Source: eLife. 2020 Jul 8;9:e55378. doi: 10.7554/eLife.55378 (PMC7343388; doi:10.7554/eLife.55378)
Supplement: Figure 2—source data 1. [file elife-55378-fig2-data1.xlsx]

## Sheet: Sheet1
NBP	Ithreshold (pA)	Vthreshold (mV)	AHP (ms)		Figure 2F
-0.15	40.473	-48.86	8.65
-0.27	20.1289	-30.1819	19.72
0.07	50.4059	-61.4929	9.65
0	20.212	-41.47	14.89
-0.25	20.098	-50.87	30.74
0.32	130.282	-53.31	3.93
0.19	50.6115	-39.856	14.93
0.24	50.5436	-40.863	9.14
-0.14	40.2667	-31.4941	19.36
-0.2	20.1126	-34.3323	54.35
0.13	60.5203	-52.8564	11.84
0.2	40.4424	-42.8772	11.3
0.45	60.4392	-60.6079	6.18
0.439	70.8092	-63.3545	6.52
0.28	100.799	-56.3355	8.42
0.29	50.4624	-41.4124	18.67
0	40.7052	-33.4473	28.24
0.26	70.6553	-59.2651	8.55
0.29	100.98	-56.1523	8.78
0.22	40.5151	-27.7405	17.39
-0.1	50.5132	-60.0891	10.81
