# Supplementary material for: Gradients in the biophysical properties of neonatal auditory neurons align with synaptic contact position and the intensity coding map of inner hair cells
Source: eLife. 2020 Jul 8;9:e55378. doi: 10.7554/eLife.55378 (PMC7343388; doi:10.7554/eLife.55378)
Supplement: Figure 3—source data 1. [file elife-55378-fig3-data1.xlsx]

## Sheet: Sheet1
Latency (ms)	Current Threshold (pA)	Current Threshold (pA)	Figure 3B
18.7	30	30
14.3	30	30
13.5	30	30
15.1	40	40
22.7	20	20
21.6	20	20
24.5	20	20
15.3	30	30
22.7	30	30
19.2	30	30
15.6	30	30
18.3	70	70
9.4	110	110
21.3	30	30
23	50	50
29.5	30	30
15.7	30	30
17.8	40	40
7.5	140	140
7.7	120	120
21.2	50	50
17.7	40	40
14.2	20	20
14.9	60	60
11.9	40	40
9.3	50	50
13.4	40	40
19.4	40	40
15.1	30	30
12.1	40	40
35.4	20.2024	20
37.1	20.2108	20
7.9	130.978	130
19.2	40.4036	40
23.4	20.1555	20
8.8	70.5483	70
10.1	40.473	40
28.8	20.1315	20
26.6	19.9918	20
10.2	80.7103	80
7.9	100.815	100
25.3	20.1289	20
17.1	50.4059	50
19.4	30.3919	30
8.6	100.932	100
15.7	20.0753	20
18	30.2813	30
13.3	141.122	140
27.6	20.212	20
35.6	20.098	20
18.5	30.3136	30
7.7	130.282	130
16.2	50.5811	50
13	70.6828	70
20.5	30.3527	30
21.5	20.0894	20
10.6	100.793	100
11.5	40.3775	40
39.9	40.517	40
16.5	50.6115	50
14.5	30.2526	30
29.3	20.1016	20
31.5	30.2959	30
16.2	50.5436	50
7.1	90.7519	90
21.3	30.3455	30
7.8	60.5371	60
15.7	40.2667	40
22.6	20.1126	20
11.8	80.867	80
10.2	40.377	40
12.7	50.4172	50
4.9	151.19	150
20.4	20.2129	20
5.7	121.085	120
27.5	40.3543	40
10	80.7055	80
22	30.2177	30
7.7	100.814	100
16.4	70	70
10.8	60.5203	60
12.1	40.4424	40
7	110.805	110
21.2	30.3136	30
53.8	20.1052	20
19.9	60.5306	60
11.8	70.5688	70
9.1	60.4392	60
6.1	110.939	110
8.2	70.5174	70
9.2	50.3679	50
7.1	70.7642	70
12.1	70.8092	70
10.7	100.799	100
4.6	80.8395	80
12.8	70.8015	70
52.6	20.3975	20
18.3	40.4529	40
12.1	90.9381	90
13.3	70.7335	70
23.7	60.6986	60
18.5	50.4624	50
25.5	30.3859	30
29.1	30.5822	30
33.9	20.2165	20
20.1	70.6634	70
22.8	40.7052	40
10	70.4645	70
10.4	70.6553	70
7.1	100.98	100
22.7	80	80
20.1	50	50
17.5	70.4757	70
14.7	30.4867	30
15.5	80.7016	80
19.3	40.5151	40
15.5	50.5132	50
19.9	30.3608	30
26	50.6972	50
34.1	20.391	20
30.7	80	80
18.4	60.9016	60
18.3	50.7398	50
39.2	30.3634	30
46.6	30.3165	30
18	70.8441	70
21.7	111.215	110
19.1	40.5652	40
7.5	60	60
28.4	35	40
14.1	55	60
14.4	20	20
23.2	30	30
34.4	25	30
18.9	30.5	30
