# Supplementary material for: Gradients in the biophysical properties of neonatal auditory neurons align with synaptic contact position and the intensity coding map of inner hair cells
Source: eLife. 2020 Jul 8;9:e55378. doi: 10.7554/eLife.55378 (PMC7343388; doi:10.7554/eLife.55378)
Supplement: Figure 3—source data 2. [file elife-55378-fig3-data2.xlsx]

## Sheet: Sheet1
NBP	Latency (ms)		Figure 3D
0.44	7.9
0.52	8.8
-0.15	10.1
-0.27	25.3
0.07	17.1
0.31	8.6
0	27.6
-0.25	35.6
0.32	7.7
0.19	16.5
0.24	16.2
-0.14	15.7
-0.2	22.6
-0.02	16.4
0.13	10.8
0.2	12.1
0.45	9.1
0.32	6.1
0.439	12.1
0.28	10.7
0.08	12.8
-0.15	23.7
0.29	18.5
0.028	20.1
0	22.8
0.2	10
0.26	10.4
0.29	7.1
-0.15	22.7
-0.14	20.1
-0.137	17.5
0.22	19.3
-0.1	15.5
0.18	19.9
-0.32	26
0	18
-0.1	19.1
-0.1	20
Type II	37.1
Type II	19.2
Type II	13
Type II	7.8
Type II	30.7
Type II	18.4
Type II	18.3
Type II	39.2
Type II	21.7
