# Supplementary material for: Gradients in the biophysical properties of neonatal auditory neurons align with synaptic contact position and the intensity coding map of inner hair cells
Source: eLife. 2020 Jul 8;9:e55378. doi: 10.7554/eLife.55378 (PMC7343388; doi:10.7554/eLife.55378)
Supplement: Figure 4—source data 1. — Conductance values are shown in units of micro Siemens. [file elife-55378-fig4-data1.xlsx]

## Sheet: Sheet1
NBP	gmax (micro Siemens)	g-30 (micro Siemens)	V1/2 (mV)	tau inact (ms)		Figure 4 F,G,H,I
0	18.8201	3.68876	20.7048	132.5
0.44	45.8465	26.3651	-29.6443	171.5
0.52	36.1316	18.2199	-24.3034	289.94
-0.15	15.1665	6.59926	-19.9474
-0.27	27.9031	4.01926	4.48543	183.85
0.07	33.2567	11.1622	-9.39894	262.74
0.31	44.4447	20.608	-15.1558	117.34
0	18.3261	3.77405	-0.617775	86.5
-0.25	24.2005	5.27728	2.36419	88.53
0.32	55.6504	26.2691	-28.147
0.19	29.5586	8.82744	-10.0367	91.21
0.24	29.5986	6.34339	-10.7195	268.48
-0.14	31.1206	6.92976	0.0673847	169.99
-0.2	33.7017	6.9724	3.02446	170.9
-0.02	28.5261	11.8979	-43.0926
0.13	25.7803	6.90843	-0.752671	115.01
0.2	30.2128	6.14083	10.062	280.91
0.45	42.0727	15.6079	-6.13398
0.32	34.9211	17.5589	-35.2975
0.439	33.5326	12.5162	-26.4814
0.28	63.2114	18.0813	0.457887	365.58
0.08	14.6903	4.47769	-9.96858	102.22
-0.15	16.635	6.65257	-11.0496	59.83
0.29	31.0004	6.09819	3.76719	260.89
0.028	18.1481	5.57579	-7.78742	127.76
0	18.3528	5.4905	-6.1927
0.2	37.8138	9.7443	6.10743
0.26	35.5798	11.3861	-6.88904	257.45
0.29	44.7606	15.1815	2.25461	180.38
-0.15	27.151	10.7038	-14.9174	167.97
-0.14	21.1209	8.25174	-11.2345
-0.137	35.3572	8.05984	22.7066	155.46
0.22	14.5301	4.85083	-1.72922	72.84
-0.1	14.2853	6.18347	-15.014
0.18	10.556	7.71868	-24.6267	207.82
-0.32	17.6141	7.58009	-13.4083	75.62
0	9.09186	5.12802	-19.3111	60.43
-0.1	19.679	7.37752	-7.41141	52.51
Type II	8.59343	2.95314	-13.2785
Type II	25.6423	7.72934	-4.73538
Type II	40.2303	6.55662	3.93108
Type II	50.3813	15.48	-6.02865	260
Type II	3.42224	1.64182	-43.0481	73.46
Type II	12.6165	5.16	-13.4859	100.75
Type II	4.3835	2.5267	-27.8292	59.43
Type II	7.50757	3.14504	-13.8819	102.74
Type II	4.60156	2.24951	-21.841	79.17
				-0.6
				-0.6
				-0.6
				-0.6
				-0.6
				-0.6
