# Supplementary material for: Gradients in the biophysical properties of neonatal auditory neurons align with synaptic contact position and the intensity coding map of inner hair cells
Source: eLife. 2020 Jul 8;9:e55378. doi: 10.7554/eLife.55378 (PMC7343388; doi:10.7554/eLife.55378)
Supplement: Figure 6—source data 1. — Conductance values are in microSiemens. [file elife-55378-fig6-data1.xlsx]

## Sheet: Sheet1
Class	Age (Days)	gmax (micro Siemens)		Figure 6C
P	1	18.8201
M	8	45.8465
M	10	36.1316
P	10	15.1665
P	5	27.9031
M	6	33.2567
P	2	12.7322
M	9	44.4447
M	4	21.4858
M	4	21.7795
M	3	18.3261
P	3	24.2005
M	10	55.6504
M	7	36.5722
M	6	29.5586
M	7	29.5986
M	4	19.4431
P	5	31.1206
P	5	33.7017
M	10	51.9656
M	7	28.5083
P	8	28.5261
M	4	25.7803
M	4	30.2128
M	8	42.0727
M	8	34.9211
M	10	33.5326
M	8	63.2114
M	4	14.6903
P	6	16.635
M	6	31.0004
M	3	11.0366
M	4	18.1481
M	4	18.3528
M	4	37.8138
M	3	35.5798
M	6	44.7606
P	6	27.151
P	6	21.1209
M	6	14.5301
P	6	14.2853
M	3	10.556
P	3	17.6141
P	4	9.09186
P	8	19.679
