# Supplementary material for: Gradients in the biophysical properties of neonatal auditory neurons align with synaptic contact position and the intensity coding map of inner hair cells
Source: eLife. 2020 Jul 8;9:e55378. doi: 10.7554/eLife.55378 (PMC7343388; doi:10.7554/eLife.55378)
Supplement: Figure 6—source data 2. [file elife-55378-fig6-data2.xlsx]

## Sheet: Sheet1
Class Modiolar/Pillar		Threshold (pA)		Age		Figure 6E
P				1
M				8
M				10
P		40.473		10
P		20.1289		5
M		50.4059		6
P		30.3919		2
M				9
M		20.0753		4
M		30.2813		4
M		20.212		3
P		20.098		3
M		130.282		10
M		40.3775		7
M		50.6115		6
M		50.5436		7
M		30.3455		4
P		40.2667		5
P		20.1126		5
M		80.867		10
M		40.377		7
P				8
M		60.5203		4
M		40.4424		4
M		60.4392		8
M				8
M		70.8092		10
M		100.799		8
M				4
P				6
M		50.4624		6
M				3
M				4
M		40.7052		4
M				4
M		70.6553		3
M		100.98		6
P				6
P				6
M		40.5151		6
P		50.5132		6
M				3
P				3
P				4
P				8
