# Supplementary material for: Gradients in the biophysical properties of neonatal auditory neurons align with synaptic contact position and the intensity coding map of inner hair cells
Source: eLife. 2020 Jul 8;9:e55378. doi: 10.7554/eLife.55378 (PMC7343388; doi:10.7554/eLife.55378)
Supplement: Figure 6—source data 3. [file elife-55378-fig6-data3.xlsx]

## Sheet: Sheet1
Class	Latency (ms)			Age (Days)		Figure 6G
P	35.4			1
M	7.9			8
M	8.8			10
P	10.1			10
P	25.3			5
M	17.1			6
P	19.4			2
M	8.6			9
M	15.7			4
M	18			4
M	27.6			3
P	35.6			3
M	7.7			10
M	11.5			7
M	16.5			6
M	16.2			7
M	21.3			4
P	15.7			5
P	22.6			5
M	11.8			10
M	10.2			7
P	16.4			8
M	10.8			4
M	12.1			4
M	9.1			8
M	6.1			8
M	12.1			10
M	10.7			8
M	12.8			4
P	23.7			6
M	18.5			6
M	33.9			3
M	20.1			4
M	22.8			4
M	10			4
M	10.4			3
M	7.1			6
P	22.7			6
P	20.1			6
M	19.3			6
P	15.5			6
M	19.9			3
P	26			3
P	18			4
P	19.1			8
